# Supplementary material for: A Critical Review of the Modelling Tools for the Reactive Transport of Organic Contaminants
Source: MDPI journal article supplement (doi:10.3390/app14093675), 2024-04-25
Supplement: s1 [file s1]

Table\_S4\_supplement. Deterministic models, area of usage, processes and method of modelling

| Model                      | Flow & Transport |    |        |               |        |               |           |                |               |                 |      | Method            |                          |           |
|----------------------------|------------------|----|--------|---------------|--------|---------------|-----------|----------------|---------------|-----------------|------|-------------------|--------------------------|-----------|
|                            | 2D               | 3D | vadose | Saturate<br>d | Steady | Transien<br>t | Advection | Dispersio<br>n | Diffusio<br>n | Anisotroph<br>y | Heat | Finite<br>Element | Finite<br>Differ<br>ence | Other     |
| 3DFATMIC                   |                  | X  | X      | X             | X      | X (EL)        | X         | X              | X             | X               | X    | X (G,<br>EL)      |                          |           |
| BIOMOC3D                   | X                | X  |        | X             |        | X             | X         | X              |               | X               |      |                   | X                        |           |
| BIOPLUME III               | X                |    | X      | X             | X      | X             | X         | X              | X             |                 |      |                   | X<br>(+MO<br>C)          |           |
| BIOREDOX-<br>MT3DMS        |                  | X  |        | X             | X      | X             | X         | X              | X             | X               |      |                   | X                        |           |
| BIOSLURP                   | X                |    | X      | X             |        | X             | X         | X              | X             | X               |      | X                 |                          |           |
| Chain 2D                   | X                |    | X      | X             | X      | X             | X         | X              | X             | X               | X    | X (G)             |                          |           |
| CORT3D                     |                  | X  |        | X             | X      | X             | X         | X              | X             | X               |      |                   | X                        |           |
| CTTRAN and<br>SEEP/W       | X                |    | X      | X             | X      | X             | X         | X              | X             | X               |      | X                 |                          |           |
| FEFLOW                     | X                | X  | X      | X             | X      | X             | X         | X              | X             | X               | X    | X                 |                          |           |
| FEHM                       | X                | X  | X      | X             | X      | X             | X         | X              | X             | X               | X    | X                 |                          |           |
| Hydrus                     | X                | X  | X      | X             | X      | X             | X         | X              | X             | X               | X    |                   | X                        |           |
| MT3D/MT3DMS                |                  | X  |        | X             | X      | X             | X         | X              | X             | X               |      |                   | X                        | X EL, TVD |
| PFLOWTRAN                  | X                | X  | X      | X             | X      | X             | X         | X              | X             |                 | X    |                   |                          | FV        |
| PHREEQC                    |                  |    |        | X             |        | X             | X         | X              | X             | X *             |      |                   | X                        | X ADE     |
| PHT3D                      |                  | X  |        | X             | X      | X             | X         | X              | X             | X               | X**  |                   | X                        | X EL, TVD |
| RT3D                       |                  | X  |        | X             | X      | X             | X         | X              | X             | X               | X    |                   | X                        |           |
| SEAM3D                     |                  | X  |        | X             | X      | X             | X         | X              | X             | X               |      |                   | X                        |           |
| SUTRA                      | X                | X  | X      | X             | X      | X             | X         | X              | X             | X               | X    | X                 | X                        |           |
| SWMS 2D/3D                 | X                | X  | X      | X             | X      | X             | X         | X              | X             | X               |      | X(G)              |                          |           |
| TMVOC                      | X                | X  | X      | X             | X      | X             | X         | X              | X             | X               | X    |                   | X                        |           |
| TOUGH2v2 and<br>TOUGHREACT | X                | X  | X      | X             | X      | X             | X         | X              | X             | X               | X    |                   | X (I)                    |           |
