# Supplementary material for: A Critical Review of the Modelling Tools for the Reactive Transport of Organic Contaminants
Source: MDPI journal article supplement (doi:10.3390/app14093675), 2024-04-25
Supplement: s1 [file s1]

Archive with 5 entries (5 files):
- applsci-2918273-supplementary/supplement_materials_Table_1_supplement.pdf
- applsci-2918273-supplementary/supplement_materials_Table_2_supplement.pdf
- applsci-2918273-supplementary/supplement_materials_Table_3_supplement.pdf
- applsci-2918273-supplementary/supplement_materials_Table_4_supplement.pdf
- applsci-2918273-supplementary/supplement_materials_Table_5_supplement.pdf
