# Supplementary material for: A Critical Review of the Modelling Tools for the Reactive Transport of Organic Contaminants
Source: MDPI journal article supplement (doi:10.3390/app14093675), 2024-04-25
Supplement: s1 [file s1 › applsci-2918273-supplementary/supplement_materials_Table_5_supplement.pdf]

Table\_S5\_supplement. Deterministic models, their availability and reactions that can be modelled

| Model            | Geochemical Reactions |       |     |   |    |      |           |                                               | Availability   |            |              | Platform             |
|------------------|-----------------------|-------|-----|---|----|------|-----------|-----------------------------------------------|----------------|------------|--------------|----------------------|
|                  | SOR                   | Ion-E | P/D | D | MO | BACT | NAPL-PART | OTHER                                         | Free           | Commercial | Cost (\$)    |                      |
| 3DFATMIC         | X                     |       | X   | X | X  | X    |           |                                               | X              |            |              | DOS                  |
| BIOMOC3D         | X                     |       |     | X | X  |      |           |                                               | X              |            |              | DOS                  |
| BIOPLUME III     | X                     | X     |     | X | X  | X    |           |                                               | X              |            |              | Windows              |
| BIOREDOX-MT3DMS  | X                     |       |     | X | X  |      |           |                                               | X              |            |              | DOS                  |
| BIOSLURP         | X                     |       |     | X |    | X    | X         | Sequential degradation                        |                | X          |              |                      |
| Chain_2D         | X                     |       |     | X |    |      |           | Sequential 1 <sup>st</sup> -order degradation | X <sup>a</sup> |            |              | Fortran              |
| CORT3D           | X                     |       |     | X |    |      |           | Oxidation of CEC by $\text{MNO}_4^-$          | X              |            |              | Windows              |
| CTRAN and SEEP/W | X                     |       |     | X |    |      |           |                                               |                | X          | 6,450        | Windows              |
| FEFLOW           | X                     |       |     | X |    |      |           |                                               |                | X          | 0 – 2,200    | Windows              |
| FEHM             | X                     | X     | X   | X | X  |      | X         |                                               | X              |            |              | Linux/MacOSX/Windows |
| Hydrus           | X                     | X     | X   | X | X  | X    |           |                                               |                | X          | 630-6,000    | Windows              |
| MT3D/MT3DMS      | X                     |       |     | X |    |      |           | 1 <sup>st</sup> -order degradation            | X              |            |              | DOS/ Windows         |
| PFLOWTRAN        | X                     | X     | X   |   | X  |      | X         |                                               | X              |            |              | Fortran, Linux       |
| PHREEQC          | X                     | X     | X   | X | X  | X    | X         |                                               | X              |            |              | DOS/ Windows         |
| PHT3D            | X                     | X     | X   | X | X  | X    | X         |                                               | X              |            |              |                      |
| RT3D             | X                     |       |     | X | X  | X    |           |                                               | X              |            |              | Windows              |
| SEAM3D           | X                     |       |     | X | X  | X    |           | 1 <sup>st</sup> -order degradation            |                | X          | 2,800-12,300 | Fortran              |
| SUTRA            | X                     |       |     | X |    |      |           |                                               |                | X          |              | DOS/Unix             |
| SWMS 2D/3D       | X                     |       | X   | X |    |      |           | 1 <sup>st</sup> -order degradation            | X              |            |              | Fortran              |

|                         |   |   |   |   |   |   |   |                                                                                       |   |   |              |  |
|-------------------------|---|---|---|---|---|---|---|---------------------------------------------------------------------------------------|---|---|--------------|--|
| TMVOC                   | X |   |   | X |   |   | X |                                                                                       |   | X | 1,125-20,000 |  |
| TOUGH2v2 and TOUGHREACT | X | X | X | X |   |   |   | surface complexation is also coded                                                    |   |   |              |  |
| UTCHEM                  | X | X | X | X | X | X | X | Biodegradation is modelled as a 1 <sup>st</sup> order, instantaneous or Monod process | X |   |              |  |

SOR - sorption, ION-E – ion exchange, P/D – precipitation, dissolution, D – degradation, MO – microbial oxidation, BACT – simulation of bacteria growth, /decay, NAPL – PART- NAPL partitioning, a – with GMS software
